# Supplementary material
Source: MDPI journal article supplement (https://www.mdpi.com/1999-4907/12/7/888)
Supplement: s1 [file s1]

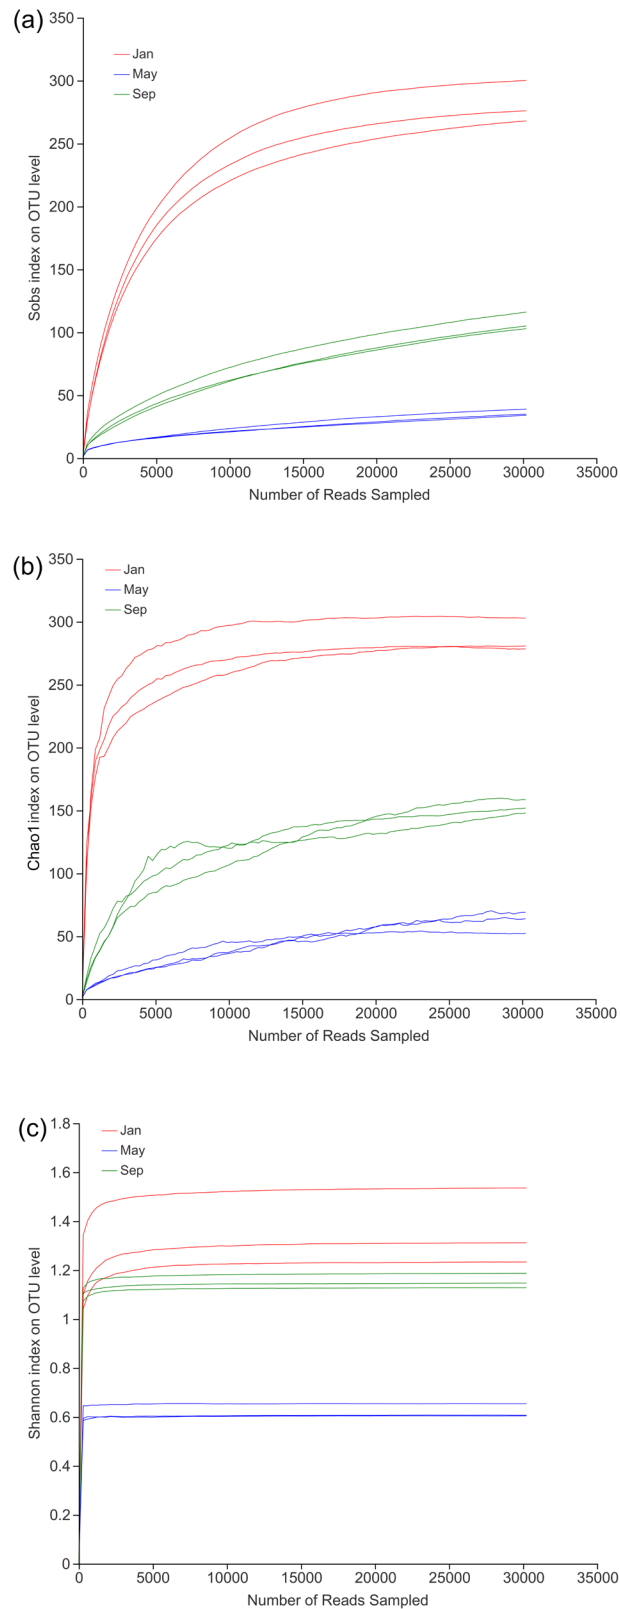

**Figure S1.** Rarefaction plots for bacterial microbiomes in the gut of *Dendroctonus valens* across seasons. (a) Observed operational taxonomic units (OTUs) plotted against the number of sequences per sample. (b) Chao1 as a measure of species richness plotted against the number of sequences per sample. (c) Shannon index of species diversity plotted against the number of sequences per sample.

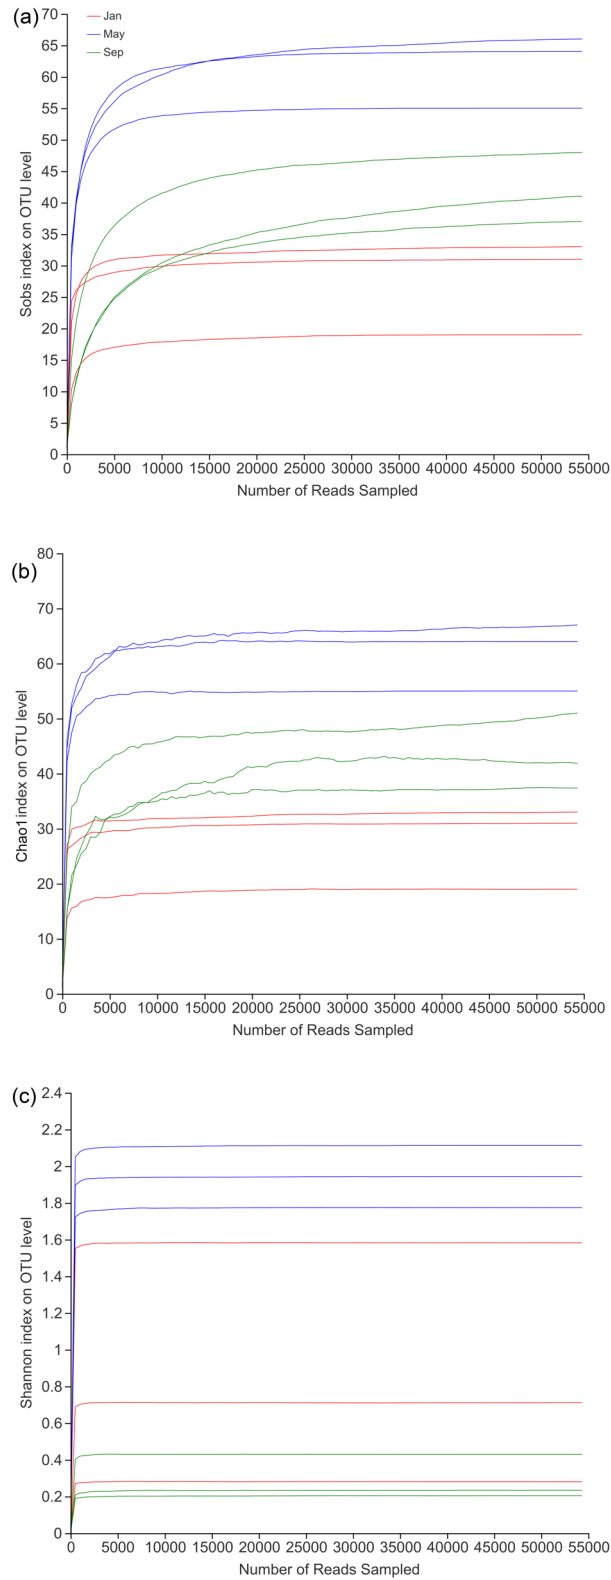

**Figure S2.** Rarefaction plots for fungal microbiomes in the gut of *D. valens* across seasons. (a) Observed operational taxonomic units (OTUs) plotted against the number of sequences per sample. (b) Chao1 as a measure of species richness plotted against the number of sequences per sample. (c) Shannon index of species diversity plotted against the number of sequences per sample.

**Table S1.** Summary of sequence number and operational taxonomic units (OTUs) in the gut microbiome of *D. valens*.

| Sample ID | Bacteria  |     | Fungi     |     |
|-----------|-----------|-----|-----------|-----|
|           | Sequences | OTU | Sequences | OTU |
| Jan_1     | 30228     | 276 | 66532     | 33  |
| Jan_2     | 32734     | 300 | 74401     | 31  |
| Jan_3     | 43446     | 273 | 72301     | 19  |
| May_1     | 30636     | 34  | 73715     | 68  |
| May_2     | 35737     | 40  | 54335     | 55  |
| May_3     | 50575     | 50  | 64277     | 65  |
| Sep_1     | 51401     | 138 | 73427     | 49  |
| Sep_2     | 50842     | 136 | 70759     | 38  |
| Sep_3     | 57422     | 131 | 72259     | 42  |
